# Supplementary material for: Effects of circadian blood pressure patterns on development of microvascular complications in pediatric patients with type 1 diabetes mellitus
Source: PubMed Central journal article supplement — Ann Pediatr Endocrinol Metab. 2022 Jan 17;27(1):44–51. doi: 10.6065/apem.2142084.042 (PMC8984744; doi:10.6065/apem.2142084.042), 2022-01-17
Supplement: apem-2142084-042-suppl.pdf [file apem-2142084-042-suppl.pdf]

**Supplementary Table 1. Blood pressure profiles (mmHg) of T1DM patients**

| Parameter          | Total (n=81) | Diabetic retinopathy |           | P-value | Microalbuminuria |           | P-value |
|--------------------|--------------|----------------------|-----------|---------|------------------|-----------|---------|
|                    |              | No (n=75)            | Yes (n=6) |         | No (n=78)        | Yes (n=3) |         |
| Office sBP mean    | 116.5±9.8    | 115.8±9.5            | 125.7±9.4 | 0.049   | 116.8±9.8        | 110.0±5.2 | 0.139   |
| Office dBP mean    | 64.0±8.2     | 63.8±8.5             | 67.0±3.4  | 0.084   | 63.9±8.2         | 65.7±10.2 | 0.799   |
| Office MAP mean    | 95.3±3.3     | 95.1±3.3             | 97.2±3.0  | 0.157   | 95.3±3.4         | 94.6±1.5  | 0.511   |
| 24-Hour sBP mean   | 117.6±0.9    | 117.5±8.2            | 118.7±7.2 | 0.719   | 115.6±2.7        | 117.7±0.9 | 0.432   |
| 24-Hour dBP mean   | 72.3±6.0     | 72.2±6.1             | 72.9±4.4  | 0.739   | 72.2±6.1         | 75.0±3.3  | 0.272   |
| 24-Hour MAP mean   | 87.4±6.3     | 87.3±6.5             | 88.2±5.0  | 0.712   | 87.3±6.4         | 88.4±3.6  | 0.673   |
| Daytime sBP mean   | 120.7±0.9    | 120.7±8.2            | 120.5±8.7 | 0.949   | 120.8±8.3        | 117.9±4.2 | 0.353   |
| Daytime dBP mean   | 75.8±6.6     | 75.9±6.6             | 75.4±6.1  | 0.869   | 75.8±6.6         | 78.2±3.0  | 0.293   |
| Daytime MAP mean   | 90.8±6.8     | 90.8±6.8             | 90.4±6.7  | 0.899   | 90.8±6.9         | 91.4±3.4  | 0.778   |
| Nighttime sBP mean | 110.4±9.3    | 110.0±9.5            | 114.8±5.7 | 0.105   | 110.5±9.4        | 107.8±8.1 | 0.621   |
| Nighttime dBP mean | 63.9±6.8     | 63.7±6.9             | 67.4±3.1  | 0.033   | 63.9±6.9         | 66.3±4.2  | 0.418   |
| Nighttime MAP mean | 79.4±7.2     | 79.1±7.4             | 83.2±2.9  | 0.017   | 79.4±7.3         | 80.1±5.5  | 0.839   |
| Systolic dip (%)   | 8.5±5.6      | 8.8±5.6              | 4.5±4.3   | 0.06    | 8.5±5.6          | 8.5±6.7   | 0.989   |
| Diastolic dip (%)  | 15.5±8.2     | 15.9±8.2             | 10.2±7.1  | 0.114   | 15.5±8.4         | 15.2±3.8  | 0.914   |

Values are presented as mean±standard deviation (mmHg).

T1DM, type 1 diabetes mellitus; sBP, systolic blood pressure; dBP, diastolic blood pressure; MAP, mean arterial pressure; SDS, standard deviation score.

**Supplementary Table 2. Office blood pressure to daytime ABPM comparison**

| Blood pressure   | Mean±SDS (mmHg) | Standard error mean | t      | P-value |
|------------------|-----------------|---------------------|--------|---------|
| Office sBP       | 116.5±9.8       | 1.086               | -      | -       |
| Daytime sBP      | 120.7±8.2       | 0.914               | -2.942 | 0.004   |
| Nighttime sBP    | 110.4±9.3       | 1.034               | -0.773 | <0.001  |
| 24-Hour mean sBP | 117.6±8.1       | 0.895               | -0.773 | 0.442   |
| Office dBP       | 64.0±8.2        | 0.916               | -      | -       |
| Daytime dBP      | 75.8±6.6        | 0.728               | -9.875 | <0.001  |
| Nighttime dBP    | 63.9±6.8        | 0.754               | 0.059  | 0.953   |
| 24-Hour mean dBP | 72.3±6.0        | 0.665               | -7.228 | <0.001  |

ABPM, ambulatory blood pressure monitoring; SDS, standard deviation score; sBP, systolic blood pressure; dBP, diastolic blood pressure.

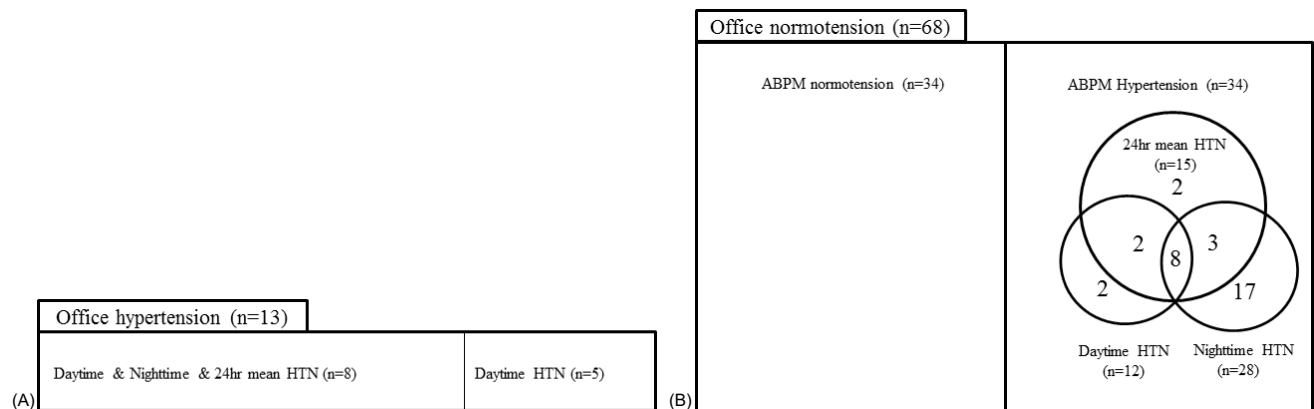

**Supplementary Fig. 1.** (A) Distribution of ABPM blood pressure in patients with office hypertension. (B) Distribution of ABPM blood pressure in patients with normal office blood pressure. ABPM, ambulatory blood pressure monitoring; HTN, hypertension.
